# Supplementary material
Source: PubMed Central journal article supplement (PMC6425171)
Supplement: JCM.00675-18-s0001.pdf [file JCM.00675-18-s0001.pdf]

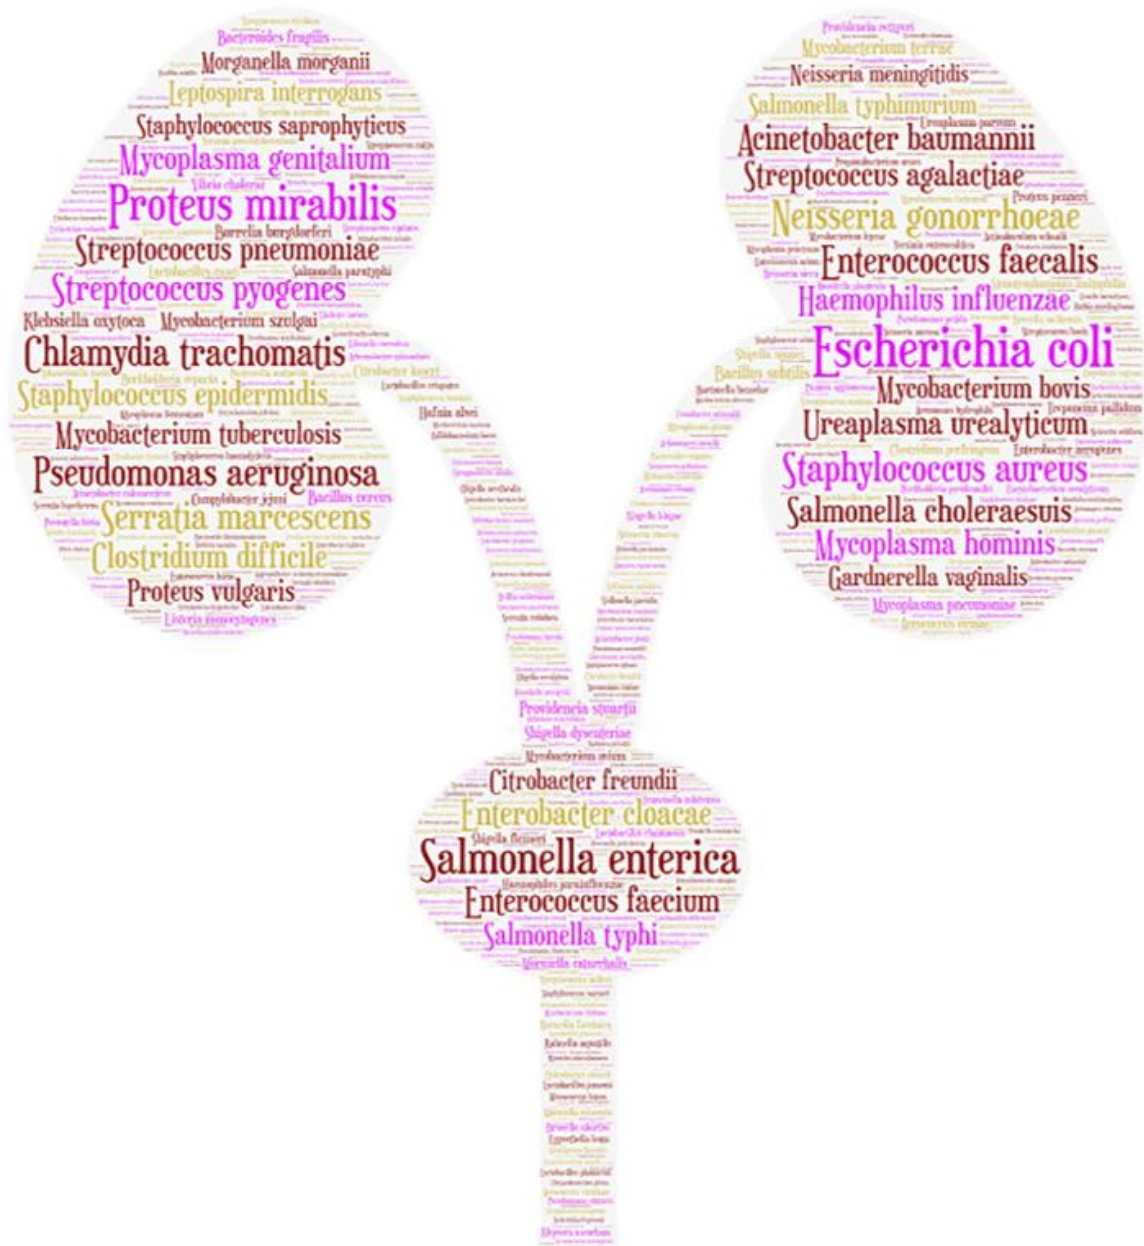

**Figure S1: Representation of the publication frequency of bacterial taxa**

This figure represents the most frequent species found at least once in the human urinary tract.

Using the online tool wordart (<https://wordart.com/create>), the size of the name of each 562 species is proportional to the number of times it occurs in the PubMed database according to the automatic query.

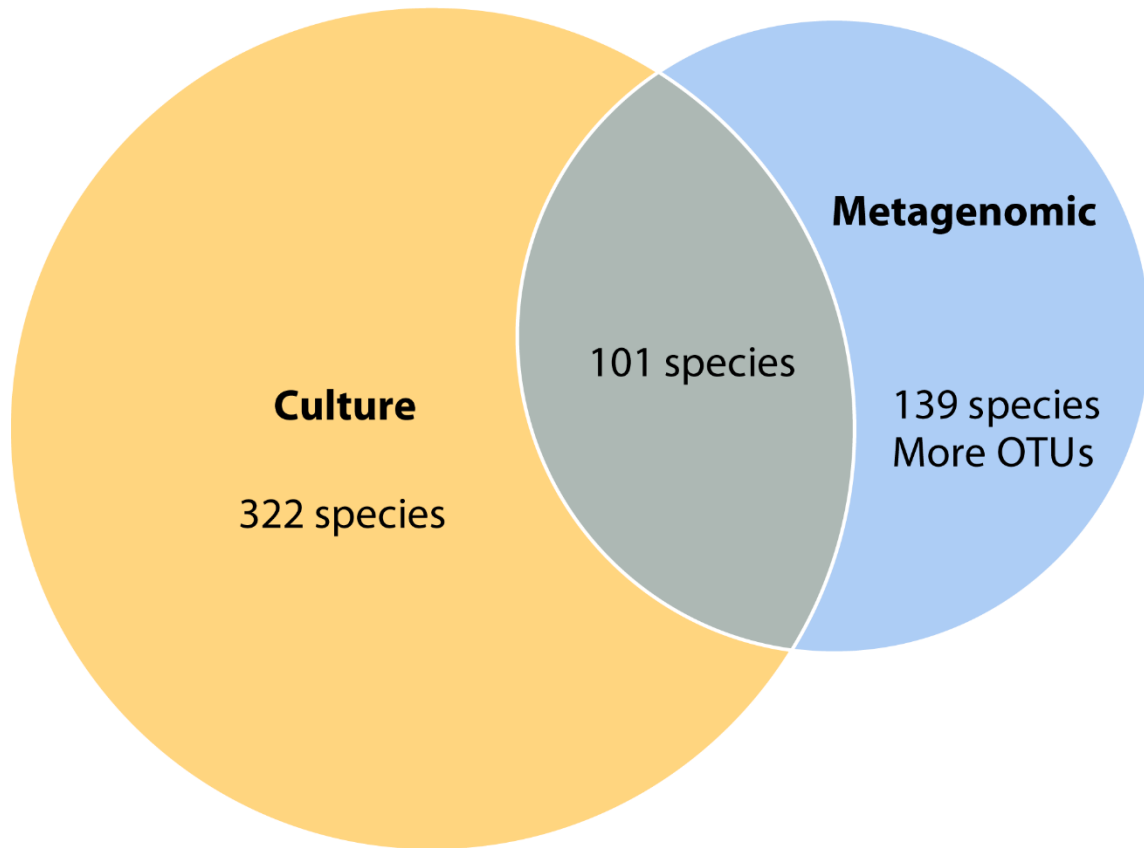

**Figure S2: Venn diagram representing the proportion of bacteria found in urine by culture and metagenomics\***

Venn diagram representing the bacterial taxa most commonly and uncommonly found by culture and metagenomic techniques. \* All the unique and shared taxa are listed in the Dataset S2.

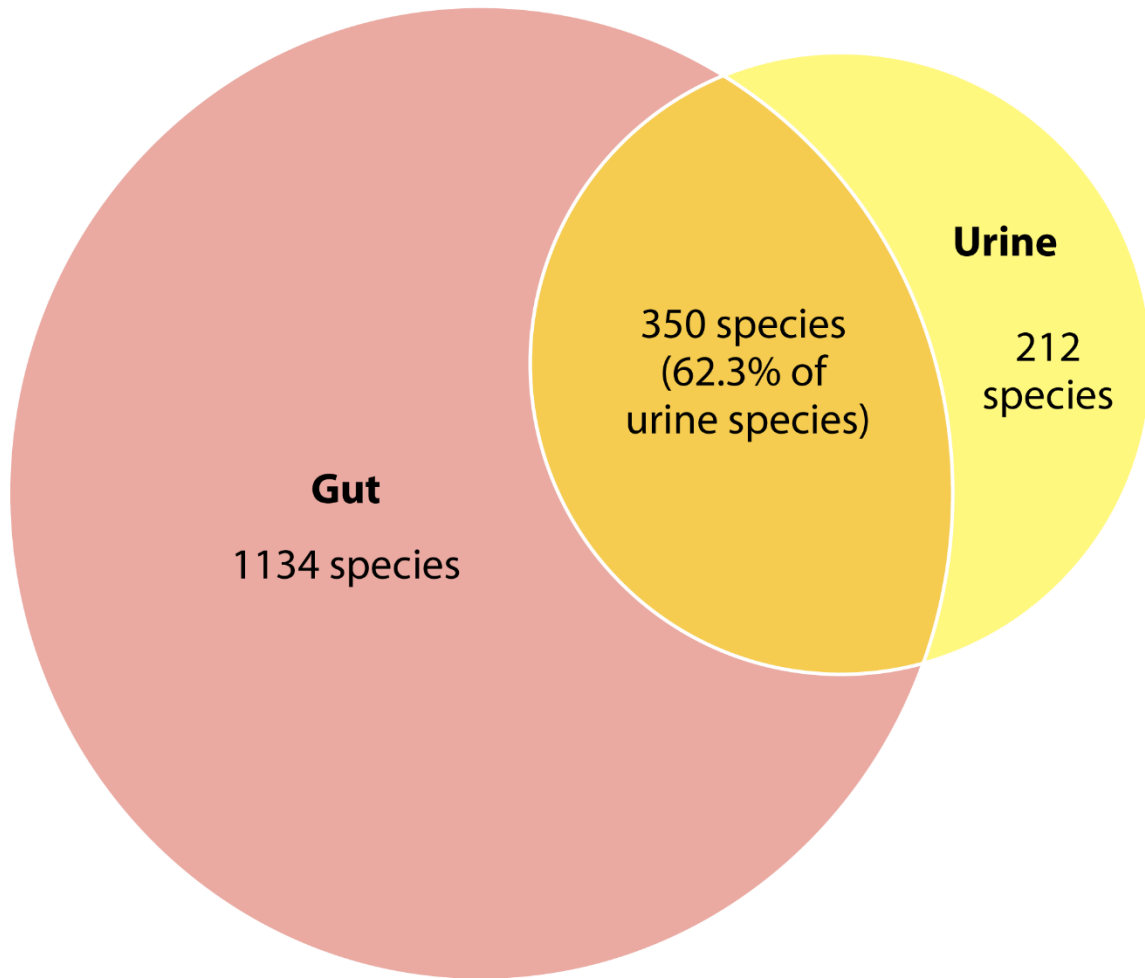

**Figure S3: Venn diagram representing the proportion of common and uncommon bacteria found in the urine and gut repertoires\***

Venn diagram representing the most common and uncommon species in the gut and urine repertoires. \* All the unique and shared taxa are listed in the Dataset S4.

| <b>Table S1: Publication frequency of bacterial taxa</b> |                  |
|----------------------------------------------------------|------------------|
| <b>Urine species</b>                                     | <b>Frequency</b> |
| <i>Escherichia coli</i>                                  | 17031            |
| <i>Staphylococcus aureus</i>                             | 4499             |
| <i>Pseudomonas aeruginosa</i>                            | 4145             |
| <i>Chlamydia trachomatis</i>                             | 4049             |
| <i>Neisseria gonorrhoeae</i>                             | 2707             |
| <i>Klebsiella pneumoniae</i>                             | 2657             |
| <i>Proteus mirabilis</i>                                 | 2193             |
| <i>Enterococcus faecalis</i>                             | 1800             |
| <i>Streptococcus pneumoniae</i>                          | 1454             |
| <i>Mycobacterium tuberculosis</i>                        | 1254             |
| <i>Streptococcus pyogenes</i>                            | 966              |
| <i>Ureaplasma urealyticum</i>                            | 961              |
| <i>Haemophilus influenzae</i>                            | 933              |
| <i>Staphylococcus epidermidis</i>                        | 925              |
| <i>Streptococcus agalactiae</i>                          | 765              |
| <i>Serratia marcescens</i>                               | 662              |
| <i>Staphylococcus saprophyticus</i>                      | 632              |
| <i>Mycobacterium bovis</i>                               | 566              |
| <i>Salmonella typhimurium</i>                            | 558              |
| <i>Mycoplasma genitalium</i>                             | 523              |
| <i>Mycoplasma hominis</i>                                | 504              |
| <i>Acinetobacter baumannii</i>                           | 446              |
| <i>Enterobacter cloacae</i>                              | 437              |
| <i>Clostridium difficile</i>                             | 431              |
| <i>Enterococcus faecium</i>                              | 397              |
| <i>Proteus vulgaris</i>                                  | 299              |
| <i>Salmonella typhi</i>                                  | 287              |
| <i>Neisseria meningitidis</i>                            | 264              |
| <i>Gardnerella vaginalis</i>                             | 251              |
| <i>Citrobacter freundii</i>                              | 241              |
| <i>Leptospira interrogans</i>                            | 233              |
| <i>Clostridium perfringens</i>                           | 203              |
| <i>Bacteroides fragilis</i>                              | 202              |
| <i>Enterobacter aerogenes</i>                            | 188              |
| <i>Klebsiella oxytoca</i>                                | 187              |
| <i>Morganella morganii</i>                               | 184              |
| <i>Salmonella enteritidis</i>                            | 181              |
| <i>Moraxella catarrhalis</i>                             | 175              |
| <i>Mycobacterium terrae</i>                              | 173              |
| <i>Mycobacterium szulgai</i>                             | 171              |
| <i>Bacillus subtilis</i>                                 | 162              |
| <i>Listeria monocytogenes</i>                            | 151              |
| <i>Haemophilus parainfluenzae</i>                        | 150              |
| <i>Shigella dysenteriae</i>                              | 141              |
| <i>Stenotrophomonas maltophilia</i>                      | 139              |
| <i>Providencia stuartii</i>                              | 137              |
| <i>Borrelia burgdorferi</i>                              | 125              |
| <i>Mycobacterium avium</i>                               | 124              |
| <i>Providencia rettgeri</i>                              | 120              |
| <i>Staphylococcus haemolyticus</i>                       | 111              |
| <i>Campylobacter jejuni</i>                              | 103              |

**Table S1: Publication frequency of bacterial taxa**

This table represents the publication frequency of the most frequent species found at least once in the human urinary tract.

**Dataset S1:** List of identified prokaryotic species with standing in nomenclature using LPSN (<http://www.bacterio.net>) and taxonomy on NCBI (<http://www-ncbi-nlm-nih-gov.gate2.inist.fr/taxonomy/?term=>) (20,660 bacteria and archaea on the 15th of February 2018) used for the automated search, and number of publications associated with the prokaryotic species according to the automated request.

**Dataset S2:** Summary of all the results obtained. Name of the bacterial species, discovery modality (metagenomic and / or culture), pathogenicity (represented according to the risk group but also according to the reported cases of human and urinary tract infections in the literature), oxygen metabolism status, taxonomic classification.

**Dataset S3:** Taxa repartition per Phyla and Genus

**Dataset S4:** Comparison of the human urinary tract repertoire, the human gut repertoire and the human global repertoire

**Dataset S5:** Ethnicity of study participants
